# Supplementary material for: Evidence-based Plastic Surgery: Assessing Progress over Two 5-year Periods from 2009 to 2019
Source: PubMed Central journal article supplement — Plast Reconstr Surg Glob Open. 2021 Jan 28;9(1):e3337. doi: 10.1097/GOX.0000000000003337 (PMC7859015; doi:10.1097/gox.0000000000003337), 2021-01-28
Supplement: gox-9-e3337-s001.pdf [file gox-9-e3337-s001.pdf]

## Supplemental Digital Content 1: List of RCTs Sub-analysed from JPRAS

### List of Abbreviations

|            |                                                          |
|------------|----------------------------------------------------------|
| APS.....   | Annals of Plastic Surgery                                |
| JPRAS..... | Journal of Plastic, Reconstructive and Aesthetic Surgery |
| PRS.....   | Plastic and Reconstructive Surgery                       |
| RCTs.....  | Randomised Control Trials                                |

Gupta D, Sharma U, Chauhan S, Sahu SA. Improved outcomes of scar revision with the use of polydioxanone suture in comparison to polyglactin 910: A randomized controlled trial. *J Plast Reconstr Aesthet Surg.* 2018 Aug;71(8):1159-1163.

Shim HS, Kwon BY, Seo BF, Kwon H, Jung SN. A prospective randomised comparison of fixation methods in Tamai's zone I amputation. *J Plast Reconstr Aesthet Surg.* 2018 Jul;71(7):997-1003.

Mendes DA, Veiga DF, Veiga-Filho J, Loyola ABAT, Paiva LF, Novo NF, Sabino-Neto M, Ferreira LM. Influence of dressing application time after breast augmentation on cutaneous colonization: A randomized clinical trial. *J Plast Reconstr Aesthet Surg.* 2018 Jun;71(6):906-912.

Bijlard E, Timman R, Verduijn GM, Niessen FB, Hovius SER, Mureau MAM. Intralesional cryotherapy versus excision with corticosteroid injections or brachytherapy for keloid treatment: Randomised controlled trials. *J Plast Reconstr Aesthet Surg.* 2018 Jun;71(6):847-856.

Sarfati I, van la Parra RFD, Terem-Rapoport CA, Benyahi D, Nos C, Clough KB. A prospective randomized study comparing centrifugation and sedimentation for fat grafting in breast reconstruction. *J Plast Reconstr Aesthet Surg.* 2017 Sep;70(9):1218-1228.

Hinchcliff KM, Orbay H, Busse BK, Charvet H, Kaur M, Sahar DE. Comparison of two cadaveric acellular dermal matrices for immediate breast reconstruction: A prospective randomized trial. *J Plast Reconstr Aesthet Surg.* 2017 May;70(5):568-576.

Malik MM, Hachach-Haram N, Tahir M, Al-Musabi M, Masud D, Mohanna PN. Acquisition of basic microsurgery skills using home-based simulation training: A randomised control study. *J Plast Reconstr Aesthet Surg.* 2017 Apr;70(4):478-486.

Ensaf F, Heinrich K, Kholosy HM, Wimbauer J, Hladik M, Wechselberger G. A double-blind randomized prospective study comparing prilocaine versus ropivacaine in upper blepharoplasty. *J Plast Reconstr Aesthet Surg.* 2017 Mar;70(3):375-379.

Sharma PR, Rosich-Medina A, Swan MC, Gillespie PH, Skepper JN, Price RD. A randomised comparison of neurotmesis using scissors or a razor blade for sural nerve graft harvest. *J Plast Reconstr Aesthet Surg.* 2016 Dec;69(12):1711-1713.

Juhl AA, Karlsson P, Damsgaard TE. Fat grafting for alleviating persistent pain after breast cancer treatment: A randomized controlled trial. *J Plast Reconstr Aesthet Surg.* 2016 Sep;69(9):1192-202.

Woo KJ, Kang BY, Min JJ, Park JW, Kim A, Oh KS. Postoperative pain control by preventive intercostal nerve block under direct vision followed by catheter-based infusion of local analgesics in rib cartilage harvest for auricular reconstruction in children with microtia: A randomized controlled trial. *J Plast Reconstr Aesthet Surg.* 2016 Sep;69(9):1203-10.

Tremp M, Delko T, Kraljević M, Zingg U, Rieger UM, Haug M, Kalbermatten DF. Outcome in body-contouring surgery after massive weight loss: A prospective matched single-blind study. *J Plast Reconstr Aesthet Surg.* 2015 Oct;68(10):1410-6.

Pool SM, Struys MM, van der Lei B. A randomised double-blinded crossover study comparing pain during anaesthetising the eyelids in upper blepharoplasty: First versus second eyelid and lidocaine versus prilocaine. *J Plast Reconstr Aesthet Surg.* 2015 Sep;68(9):1242-7.

Collins AM, Quinlan CS, Dolan RT, O'Neill SP, Tierney P, Cronin KJ, Ridgway PF. Audiovisual preconditioning enhances the efficacy of an anatomical dissection course: A randomised study. *J Plast Reconstr Aesthet Surg.* 2015 Jul;68(7):1010-5.

Koide S, Smoll NR, Liew J, Smith K, Rizzitelli A, Findlay MW, Hunter-Smith DJ. A randomized 'N-of-1' single blinded clinical trial of barbed dermal sutures vs. smooth sutures in elective plastic surgery shows differences in scar appearance two-years post-operatively. *J Plast Reconstr Aesthet Surg.* 2015 Jul;68(7):1003-9.

Klasson S, Svensson H, Malm K, Wassélius J, Velandar P. Preoperative CT angiography versus Doppler ultrasound mapping of abdominal perforator in DIEP breast reconstructions: A randomized prospective study. *J Plast Reconstr Aesthet Surg.* 2015 Jun;68(6):782-6.

Marsh DJ, Fox A, Grobbelaar AO, Chana JS. Abdominoplasty and seroma: a prospective randomised study comparing scalpel and handheld electrocautery dissection. *J Plast Reconstr Aesthet Surg.* 2015 Feb;68(2):192-6.

Kääriäinen M, Giordano S, Kauhanen S, Helminen M, Kuokkanen H. No need to cut the nerve in LD reconstruction to avoid jumping of the breast: a prospective randomized study. *J Plast Reconstr Aesthet Surg.* 2014 Aug;67(8):1106-10.
