# Supplementary material for: Evidence-based Plastic Surgery: Assessing Progress over Two 5-year Periods from 2009 to 2019
Source: PubMed Central journal article supplement — Plast Reconstr Surg Glob Open. 2021 Jan 28;9(1):e3337. doi: 10.1097/GOX.0000000000003337 (PMC7859015; doi:10.1097/gox.0000000000003337), 2021-01-28
Supplement: gox-9-e3337-s002.pdf [file gox-9-e3337-s002.pdf]

## Supplemental Digital Content 2: List of RCTs Sub-analysed from PRS

### List of Abbreviations

|            |                                                          |
|------------|----------------------------------------------------------|
| APS.....   | Annals of Plastic Surgery                                |
| JPRAS..... | Journal of Plastic, Reconstructive and Aesthetic Surgery |
| PRS.....   | Plastic and Reconstructive Surgery                       |
| RCTs.....  | Randomised Control Trials                                |

Phillips TJ, Fung E, Rigby MH, Burke E, Hart RD, Trites JRB, Gassner HG, Taylor SM. The Use of Botulinum Toxin Type A in the Healing of Thyroidectomy Wounds: A Randomized, Prospective, Placebo-Controlled Study. *Plast Reconstr Surg.* 2019 Feb;143(2):375e-381e.

Moortgat P, Meirte J, Maertens K, Lafaire C, De Cuyper L, Anthonissen M. Can a Cohesive Silicone Bandage Outperform an Adhesive Silicone Gel Sheet in the Treatment of Scars? A Randomized Comparative Trial. *Plast Reconstr Surg.* 2019 Mar;143(3):902-911

Curran MWT, Morhart MJ, Olson JL, Hachisuka A, Chan KM. Acetyl-L-Carnitine to Enhance Nerve Regeneration in Carpal Tunnel Syndrome: A Double-Blind, Randomized, Controlled Trial. *Plast Reconstr Surg.* 2019 Jan;143(1):111e-120e.

Azimi F, Flitcroft K, Mathieu E, Karantonis R, Snook K, Spillane AJ. Low-Level Laser Treatment Is Ineffective for Capsular Contracture: Results of the LaTCon Randomized Controlled Trial. *Plast Reconstr Surg.* 2018 Nov;142(5):621e-631e.

Yoelin SG, Dhawan SS, Vitarella D, Ahmad W, Hasan F, Abushakra S. Safety and Efficacy of EB-001, a Novel Type E Botulinum Toxin, in Subjects with Glabellar Frown Lines: Results of a Phase 2, Randomized, Placebo-Controlled, Ascending-Dose Study. *Plast Reconstr Surg.* 2018 Dec;142(6):847e-855e.

Plana NM, Rifkin WJ, Kantar RS, David JA, Maliha SG, Farber SJ, Staffenberg DA, Grayson BH, Diaz-Siso JR, Flores RL. A Prospective, Randomized, Blinded Trial Comparing Digital Simulation to Textbook for Cleft Surgery Education. *Plast Reconstr Surg.* 2019 Jan;143(1):202-209.

Minteer DM, Gusenoff BR, Gusenoff JA. Fat Grafting for Pedal Fat Pad Atrophy in a 2-Year, Prospective, Randomized, Crossover, Single-Center Clinical Trial. *Plast Reconstr Surg.* 2018 Dec;142(6):862e-871e

Jabbour SF, Awaida CJ, ElKhoury JS, Rayess YA, Makhoul RB, Kechichian EG, Nasr MW. The Impact of Upper Face Botulinum Toxin Injections on Eyebrow Height and Forehead Lines: A Randomized Controlled Trial and an Algorithmic Approach to Forehead Injection. *Plast Reconstr Surg.* 2018 Nov;142(5):1212-1217.

Jensen J, Gentzkow G, Berman G, Senne L, Jewell M, Connall TP, Miller SR, Galiano RD, Young L. Anti-CTGF Oligonucleotide Reduces Severity of Postsurgical Hypertrophic Scars in a Randomized, Double-Blind, Within-Subject, Placebo-Controlled Study. *Plast Reconstr Surg.* 2018 Aug;142(2):192e-201e.

Neubrech F, Sauerbier M, Moll W, Seegmüller J, Heider S, Harhaus L, Bickert B, Kneser U, Kremer T. Enhancing the Outcome of Traumatic Sensory Nerve Lesions of the Hand by Additional Use of a Chitosan Nerve Tube in Primary Nerve Repair: A Randomized Controlled Bicentric Trial. *Plast Reconstr Surg.* 2018 Aug;142(2):415-424.

Nagata T, Miura K, Homma Y, Fukamizu H. Comparison between Negative-Pressure Fixation and Film Dressing in Wound Management after Tissue Expansion: A Randomized Controlled Trial. *Plast Reconstr Surg.* 2018 Jul;142(1):37-41.

Gatherwright J, Knackstedt RW, Ghaznavi AM, Bernard S, Schwarz G, Moreira A, Gurunluoglu R, Djohan R. Prospective, Randomized, Controlled Comparison of Bupivacaine versus Liposomal Bupivacaine for Pain Management after Unilateral Delayed Deep Inferior Epigastric Perforator Free Flap Reconstruction. *Plast Reconstr Surg.* 2018 Jun;141(6):1327-1330.

Reddy RR, Gosla Reddy S, Chilakalapudi A, Kokali S, Bronkhorst EM, Kummer AW, Bergé SJ, Kuijpers-Jagtman AM. Effect of One-Stage versus Two-Stage Palatoplasty on Hypernasality and Fistula Formation in Children with Complete Unilateral Cleft Lip and Palate: A Randomized Controlled Trial. *Plast Reconstr Surg.* 2018 Jul;142(1):42e-50e.

Burusapat C, Supawan M, Pruksapong C, Pitiseree A, Suwantemee C. Topical Aloe Vera Gel for Accelerated Wound Healing of Split-Thickness Skin Graft Donor Sites: A Double-Blind, Randomized, Controlled Trial and Systematic Review. *Plast Reconstr Surg.* 2018 Jul;142(1):217-226.

Hu L, Zou Y, Chang SJ, Qiu Y, Chen H, Gang M, Jin Y, Lin X. Effects of Botulinum Toxin on Improving Facial Surgical Scars: A Prospective, Split-Scar, Double-Blind, Randomized Controlled Trial. *Plast Reconstr Surg.* 2018 Mar;141(3):646-650.

Lanier ST, Lewis KC, Kendall MC, Vieira BL, De Oliveira G Jr, Nader A, Kim JYS, Alghoul M. Intraoperative Nerve Blocks Fail to Improve Quality of Recovery after Tissue Expander Breast Reconstruction: A Prospective, Double-Blinded, Randomized, Placebo-Controlled Clinical Trial. *Plast Reconstr Surg.* 2018 Mar;141(3):590-597.

Saonanon P, Sithanon S. External Levator Advancement versus Müller Muscle-Conjunctival Resection for Aponeurotic Blepharoptosis: A Randomized Clinical Trial. *Plast Reconstr Surg.* 2018 Feb;141(2):213e-219e.

El-Khoury JS, Jabbour SF, Awaida CJ, Rayess YA, Kechichian EG, Nasr MW. The Impact of Botulinum Toxin on Brow Height and Morphology: A Randomized Controlled Trial. *Plast Reconstr Surg.* 2018 Jan;141(1):75-78.

Hallam MJ, Pitt E, Thomas A, Nduka C. Low-Dose Insulin as an Antiscarring Therapy in Breast Surgery: A Randomized Controlled Trial. *Plast Reconstr Surg.* 2018 Apr;141(4):476e-485e.

Willemsen JCN, Van Dongen J, Spiekman M, Vermeulen KM, Harmsen MC, van der Lei B, Stevens HPJ. The Addition of Platelet-Rich Plasma to Facial Lipofilling: A Double-Blind, Placebo-Controlled, Randomized Trial. *Plast Reconstr Surg.* 2018 Feb;141(2):331-343.

Li D, Wang X, Wu Y, Sun J, Li Q, Guo S, Jia Y, Murphy DK. A Randomized, Controlled, Multicenter Study of Juvéderm Voluma for Enhancement of Malar Volume in Chinese Subjects. *Plast Reconstr Surg.* 2017 Jun;139(6):1250e-1259e.

Christie BM, Kapur S, Kempton SJ, Hanson SE, Ma Y, Rao VK. A Prospective Randomized Trial Comparing the Effects of Lidocaine in Breast Reduction Surgery. *Plast Reconstr Surg.* 2017 May;139(5):1074e-1079e.

Hart AM, Duggal C, Pinell-White X, Losken A. A Prospective Randomized Trial of the Efficacy of Fibrin Glue, Triamcinolone Acetonide, and Quilting Sutures in Seroma Prevention after Latissimus Dorsi Breast Reconstruction. *Plast Reconstr Surg.* 2017 Apr;139(4):854e-863e.

Nava MB, Rocco N, Catanuto G, Frangou J, Rispoli C, Ottolenghi J, Bruno N, Spano A. Role of Mitomycin C in Preventing Capsular Contracture in Implant-Based Reconstructive Breast Surgery: A Randomized Controlled Trial. *Plast Reconstr Surg.* 2017 Apr;139(4):819-826.

Hidalgo DA, Weinstein AL. Intraoperative Comparison of Anatomical versus Round Implants in Breast Augmentation: A Randomized Controlled Trial. *Plast Reconstr Surg.* 2017 Mar;139(3):587-596.

Stekelenburg CM, Jaspers ME, Jongen SJ, Baas DC, Gardien KL, Hiddingh J, van Zuijlen PP. Perforator-Based Interposition Flaps Perform Better Than Full-Thickness Grafts for the Release of Burn Scar Contractures: A Multicenter Randomized Controlled Trial. *Plast Reconstr Surg.* 2017 Feb;139(2):501e-509e.

Peter Suh HS, Hong JP. Effects of Incisional Negative-Pressure Wound Therapy on Primary Closed Defects after Superficial Circumflex Iliac Artery Perforator Flap Harvest: Randomized Controlled Study. *Plast Reconstr Surg.* 2016 Dec;138(6):1333-1340.

Wong AL, Martin J, Tang D, LeBlanc M, Morris SF, Paletz J, Stein J, Wong MJ, Bezuhly M. The Effect of Written Information on Recall of Surgical Risks of Carpal Tunnel Release Surgery: A Randomized Controlled Study. *Plast Reconstr Surg.* 2016 Dec;138(6):1011e-1018e.

Ascherman JA, Zeidler K, Morrison KA, Appel JZ, Berkowitz RL, Castle J, Colwell A, Chun Y, Johnson D, Mohebbali K. Carbon Dioxide-Based versus Saline Tissue Expansion for Breast Reconstruction: Results of the XPAND Prospective, Randomized Clinical Trial. *Plast Reconstr Surg.* 2016 Dec;138(6):1161-1170.

Gusenoff JA, Mitchell RT, Jeong K, Wukich DK, Gusenoff BR. Autologous Fat Grafting for Pedal Fat Pad Atrophy: A Prospective Randomized Clinical Trial. *Plast Reconstr Surg.* 2016 Nov;138(5):1099-1108.

Sherman KA, Shaw LK, Winch CJ, Harcourt D, Boyages J, Cameron LD, Brown P, Lam T, Elder E, French J, Spillane A; BRECONDA Collaborative Research Group. Reducing Decisional Conflict and Enhancing Satisfaction with Information among Women Considering Breast Reconstruction following Mastectomy: Results from the BRECONDA Randomized Controlled Trial. *Plast Reconstr Surg.* 2016 Oct;138(4):592e-602e.

van Exsel DC, Pool SM, van Uchelen JH, Edens MA, van der Lei B, Melenhorst WB. Arnica Ointment 10% Does Not Improve Upper Blepharoplasty Outcome: A Randomized, Placebo-Controlled Trial. *Plast Reconstr Surg.* 2016 Jul;138(1):66-73.

Raittinen L, Kääriäinen MT, Lopez JF, Pukander J, Laranne J. The Effect of Norepinephrine and Dopamine on Radial Forearm Flap Partial Tissue Oxygen Pressure and Microdialysate Metabolite Measurements: A Randomized Controlled Trial. *Plast Reconstr Surg.* 2016 Jun;137(6):1016e-23e.

Kan HJ, Selles RW, van Nieuwenhoven CA, Zhou C, Khouri RK, Hovius SE. Percutaneous Aponeurotomy and Lipofilling (PALF) versus Limited Fasciectomy in Patients with Primary Dupuytren's Contracture: A Prospective, Randomized, Controlled Trial. *Plast Reconstr Surg.* 2016 Jun;137(6):1800-12.

Zhang X, Huang X, Wang X, Wen S, Sun J, Shao X. A Randomized Comparison of Double Small, Standard, and Endoscopic Approaches for Carpal Tunnel Release. *Plast Reconstr Surg*. 2016 Sep;138(3):641-7.

Wilson AJ, Chang B, Taglienti AJ, Chin BC, Chang CS, Folsom N, Percec I. A Quantitative Analysis of OnabotulinumtoxinA, AbobotulinumtoxinA, and IncobotulinumtoxinA: A Randomized, Double-Blind, Prospective Clinical Trial of Comparative Dynamic Strain Reduction. *Plast Reconstr Surg*. 2016 May;137(5):1424-33.

Wolf O, Clemens MW, Purugganan RV, Crosby MA, Kowalski AM, Kee SS, Liu J, Goravanchi F. A Prospective, Randomized, Controlled Trial of Paravertebral Block versus General Anesthesia Alone for Prosthetic Breast Reconstruction. *Plast Reconstr Surg*. 2016 Apr;137(4):660e-666e.

Simsek G, Sari E, Kilic R, Bayar Muluk N. Topical Application of Arnica and Mucopolysaccharide Polysulfate Attenuates Periorbital Edema and Ecchymosis in Open Rhinoplasty: A Randomized Controlled Clinical Study. *Plast Reconstr Surg*. 2016 Mar;137(3):530e-535e.

Davison PG, Boudreau N, Burrows R, Wilson KL, Bezuhly M. Forearm-Based Ulnar Gutter versus Hand-Based Thermoplastic Splint for Pediatric Metacarpal Neck Fractures: A Blinded, Randomized Trial. *Plast Reconstr Surg*. 2016 Mar;137(3):908-16.

Roh NK, Kim MJ, Lee YW, Choe YB, Ahn KJ. A Split-Face Study of the Effects of a Stabilized Hyaluronic Acid-Based Gel of Nonanimal Origin for Facial Skin Rejuvenation Using a Stamp-Type Multineedle Injector: A Randomized Clinical Trial. *Plast Reconstr Surg*. 2016 Mar;137(3):809-16.

Joo HJ, Woo YJ, Kim JE, Kim BJ, Kang H. A Randomized Clinical Trial to Evaluate the Efficacy and Safety of Lidocaine-Containing Monophasic Hyaluronic Acid Filler for Nasolabial Folds. *Plast Reconstr Surg*. 2016 Mar;137(3):799-808.

Hop MJ, Stekelenburg CM, Hiddingh J, Kuipers HC, Middelkoop E, Nieuwenhuis MK, Polinder S, van Baar ME; LDI Study Group. Cost-Effectiveness of Laser Doppler Imaging in Burn Care in The Netherlands: A Randomized Controlled Trial. *Plast Reconstr Surg*. 2016 Jan;137(1):166e-176e.

Aznar ML, Schönmeyr B, Echaniz G, Nebeker L, Wendby L, Campbell A. Role of Postoperative Antimicrobials in Cleft Palate Surgery: Prospective, Double-Blind, Randomized, Placebo-Controlled Clinical Study in India. *Plast Reconstr Surg*. 2015 Jul;136(1):59e-66e.

Gdalevitch P, Van Laeken N, Bahng S, Ho A, Bovill E, Lennox P, Brasher P, Macadam S. Effects of nitroglycerin ointment on mastectomy flap necrosis in immediate breast reconstruction: a randomized controlled trial. *Plast Reconstr Surg*. 2015 Jun;135(6):1530-9.

Rohde CH, Taylor EM, Alonso A, Ascherman JA, Hardy KL, Pilla AA. Pulsed Electromagnetic Fields Reduce Postoperative Interleukin-1 $\beta$ , Pain, and Inflammation: A Double-Blind, Placebo-Controlled Study in TRAM Flap Breast Reconstruction Patients. *Plast Reconstr Surg*. 2015 May;135(5):808e-817e.

Yeilding RH, Fezza JP. A Prospective, Split-Face, Randomized, Double-Blind Study Comparing OnabotulinumtoxinA to IncobotulinumtoxinA for Upper Face Wrinkles. *Plast Reconstr Surg*. 2015 May;135(5):1328-35.

Guyuron B, Harvey D, Reed D. A Prospective Randomized Outcomes Comparison of Two Temple Migraine Trigger Site Deactivation Techniques. *Plast Reconstr Surg*. 2015 Jul;136(1):159-65.

White N, Dobbs TD, Murphy GR, Khan K, Batt JP, Cogswell LK. Oxygen reduces tourniquet-associated pain: a double-blind, randomized, controlled trial for application in hand surgery. *Plast Reconstr Surg*. 2015 Apr;135(4):721e-30e.

Braam KI, Kooijmans EC, van Dulmen-den Broeder E, Veening MA, Schouten-van Meeteren AY, Verhaegen PD, Kaspers GJ, Niessen FB, Heij HA. No efficacy for silicone gel sheeting in prevention of abnormal scar formation in children with cancer: a randomized controlled trial. *Plast Reconstr Surg*. 2015 Apr;135(4):1086-94.

Yi JW, Kim JK. Prospective randomized comparison of scar appearances between cograft of acellular dermal matrix with autologous split-thickness skin and autologous split-thickness skin graft alone for full-thickness skin defects of the extremities. *Plast Reconstr Surg*. 2015 Mar;135(3):609e-616e.

Pool SM, van Exsel DC, Melenhorst WB, Cromheecke M, van der Lei B. The effect of eyelid cooling on pain, edema, erythema, and hematoma after upper blepharoplasty: a randomized, controlled, observer-blinded evaluation study. *Plast Reconstr Surg*. 2015 Feb;135(2):277e-81e.

Agarwal JP, Mendenhall SD, Anderson LA, Ying J, Boucher KM, Liu T, Neumayer LA. The breast reconstruction evaluation of acellular dermal matrix as a sling trial (BREASTrial): design and methods of a prospective randomized trial. *Plast Reconstr Surg*. 2015 Jan;135(1):20e-8e.

Ferreira Laso L, Lopez-Picado A, Lamata L, Ceballos Garcia M, Ibañez López C, Pipaon Ruilope L, Lamata Hernandez F, Antoñanzas Villar F, Valero Martinez C, Aizpuru F, Hernanz Chaves R. Postoperative analgesia by

infusion of local anesthetic into the surgical wound after modified radical mastectomy: a randomized clinical trial. *Plast Reconstr Surg.* 2014 Dec;134(6):862e-70e.

Zhong T, Ojha M, Bagher S, Butler K, Srinivas C, McCluskey SA, Clarke H, O'Neill AC, Novak CB, Hofer SO. Transversus abdominis plane block reduces morphine consumption in the early postoperative period following microsurgical abdominal tissue breast reconstruction: a double-blind, placebo-controlled, randomized trial. *Plast Reconstr Surg.* 2014 Nov;134(5):870-8.

Thoma A, Kaur MN, Tsoi B, Ziolkowski N, Duku E, Goldsmith CH. Cost-effectiveness analysis parallel to a randomized controlled trial comparing vertical scar reduction and inverted T-shaped reduction mammoplasty. *Plast Reconstr Surg.* 2014 Dec;134(6):1093-107.

Valente DS. Preemptive analgesia with bupivacaine in reduction mammoplasty: a prospective, randomized, double-blind, placebo-controlled trial. *Plast Reconstr Surg.* 2014 Oct;134(4):581-6.

Longaker MT, Rohrich RJ, Greenberg L, Furnas H, Wald R, Bansal V, Seify H, Tran A, Weston J, Korman JM, Chan R, Kaufman D, Dev VR, Mele JA, Januszyk M, Cowley C, McLaughlin P, Beasley B, Gurtner GC. A randomized controlled trial of the embrace advanced scar therapy device to reduce incisional scar formation. *Plast Reconstr Surg.* 2014 Sep;134(3):536-46.

Macaré van Maurik JF, van Hal M, van Eijk RP, Kon M, Peters EJ. Value of surgical decompression of compressed nerves in the lower extremity in patients with painful diabetic neuropathy: a randomized controlled trial. *Plast Reconstr Surg.* 2014 Aug;134(2):325-32.

Chang CS, Wallace CG, Pai BC, Chiu YT, Hsieh YJ, Chen IJ, Liao YF, Liou EJ, Chen PK. Comparison of two nasoalveolar molding techniques in unilateral complete cleft lip patients: a randomized, prospective, single-blind trial to compare nasal outcomes. *Plast Reconstr Surg.* 2014 Aug;134(2):275-82.
