# Supplementary material for: Evidence-based Plastic Surgery: Assessing Progress over Two 5-year Periods from 2009 to 2019
Source: PubMed Central journal article supplement — Plast Reconstr Surg Glob Open. 2021 Jan 28;9(1):e3337. doi: 10.1097/GOX.0000000000003337 (PMC7859015; doi:10.1097/gox.0000000000003337), 2021-01-28
Supplement: gox-9-e3337-s003.pdf [file gox-9-e3337-s003.pdf]

## Supplemental Digital Content 3: List of RCTs Sub-analysed From APS

### List of Abbreviations

|            |                                                          |
|------------|----------------------------------------------------------|
| APS.....   | Annals of Plastic Surgery                                |
| JPRAS..... | Journal of Plastic, Reconstructive and Aesthetic Surgery |
| PRS.....   | Plastic and Reconstructive Surgery                       |
| RCTs.....  | Randomised Control Trials                                |

Hsieh MC, Wu YC, Huang SH, Kuo YR, Lee SS. A Single-Center, Randomized, Double-Blind, Placebo-Controlled Clinical Trial of the Effectiveness of ANT1 Soybean Extract Cream on Skin Recovery After Nd: YAG Laser Treatment. *Ann Plast Surg.* 2018 Feb;80(2S Suppl 1):S26-S29.

Yeung CY, Hsieh PS, Wei LG, Hsia LC, Dai LG, Fu KY, Dai NT. Efficacy of Lyophilised Platelet-Rich Plasma Powder on Healing Rate in Patients With Deep Second Degree Burn Injury: A Prospective Double-Blind Randomized Clinical Trial. *Ann Plast Surg.* 2018 Feb;80(2S Suppl 1):S66-S69.

Lin HH, Kim SG, Kim HY, Niu LS, Lo LJ. Higher Dose of Dexamethasone Does Not Further Reduce Facial Swelling After Orthognathic Surgery: A Randomized Controlled Trial Using 3-Dimensional Photogrammetry. *Ann Plast Surg.* 2017 Mar;78(3 Suppl 2):S61-S69.

Luan A, Hui KJ, Remington AC, Liu X, Lee GK. Effects of A Novel Decision Aid for Breast Reconstruction: A Randomized Prospective Trial. *Ann Plast Surg.* 2016 May;76 Suppl 3:S249-54.

Beraldo FN, Veiga DF, Veiga-Filho J, Garcia ES, Vilas-Bôas GS, Juliano Y, Sabino-Neto M, Ferreira LM. Sexual Function and Depression Outcomes Among Breast Hypertrophy Patients Undergoing Reduction Mammoplasty: A Randomized Controlled Trial. *Ann Plast Surg.* 2016 Apr;76(4):379-82.

Lewin R, Elander A, Thorarinsson A, Kölby L, Sahlin PE, Lundberg J, Panczel A, Lidén M. A randomized prospective study of prophylactic cloxacillin in breast reduction surgery. *Ann Plast Surg.* 2015 Jan;74(1):17-21.

Michelotti B, Romanowsky D, Hauck RM. Prospective, randomized evaluation of endoscopic versus open carpal tunnel release in bilateral carpal tunnel syndrome: an interim analysis. *Ann Plast Surg.* 2014 Dec;73 Suppl 2:S157-60.

Koonce SL, Eck DL, Shaddix KK, Perdakis G. A prospective randomized controlled trial comparing N-butyl-2 cyanoacrylate (Histoacryl), octyl cyanoacrylate (Dermabond), and subcuticular suture for closure of surgical incisions. *Ann Plast Surg.* 2015 Jan;74(1):107-10.

Lo KK, Aycock JK. A blinded randomized controlled trial to evaluate the use of botulinum toxin for pain control in breast reconstruction with tissue expanders. *Ann Plast Surg.* 2015 Mar;74(3):281-3.
